# Supplementary material for: Defect dipoles and stable dielectric properties improve Nb-doped Ba0.7Sr0.3TiO3 photocatalytic H2 evolution activity
Source: Royal Society of Chemistry journal article supplement (doi:10.1039/d3ta06383f), 2023-12-13
Supplement: d3ta06383f1.pdf [file d3ta06383f1.pdf]

# Supporting Information

## Defect dipoles and stable dielectric properties improve Nb-doped $\text{Ba}_{0.7}\text{Sr}_{0.3}\text{TiO}_3$ photocatalytic $\text{H}_2$ evolution activity

Kefan Liu<sup>ab</sup>, Zhaoyu Wang<sup>c</sup>, Guanqi Wang<sup>b</sup>, Xinyi Zhang<sup>b</sup>, Ping He<sup>b</sup>, Yuhui Huang<sup>a</sup>, Zijian

Hong<sup>\*a</sup>, Haiwang Wang<sup>\*b</sup>

<sup>a</sup> *Lab of Dielectric Materials School of Materials Science and Engineering Zhejiang University*

*Hangzhou 310027, China E-mail: hongzijian100@zju.edu.cn*

<sup>b</sup> *School of Resources and Materials, Northeastern University at Qinhuangdao, Qinhuangdao,*

*Hebei 066004, P. R. China. E-mail: whwdbdx@126.com*

<sup>c</sup> *State Key Laboratory of Structural Chemistry, Fujian Institute of Research on the Structure of*

*Matter, Chinese Academy of Sciences Fuzhou, Fujian 350002 (China)*

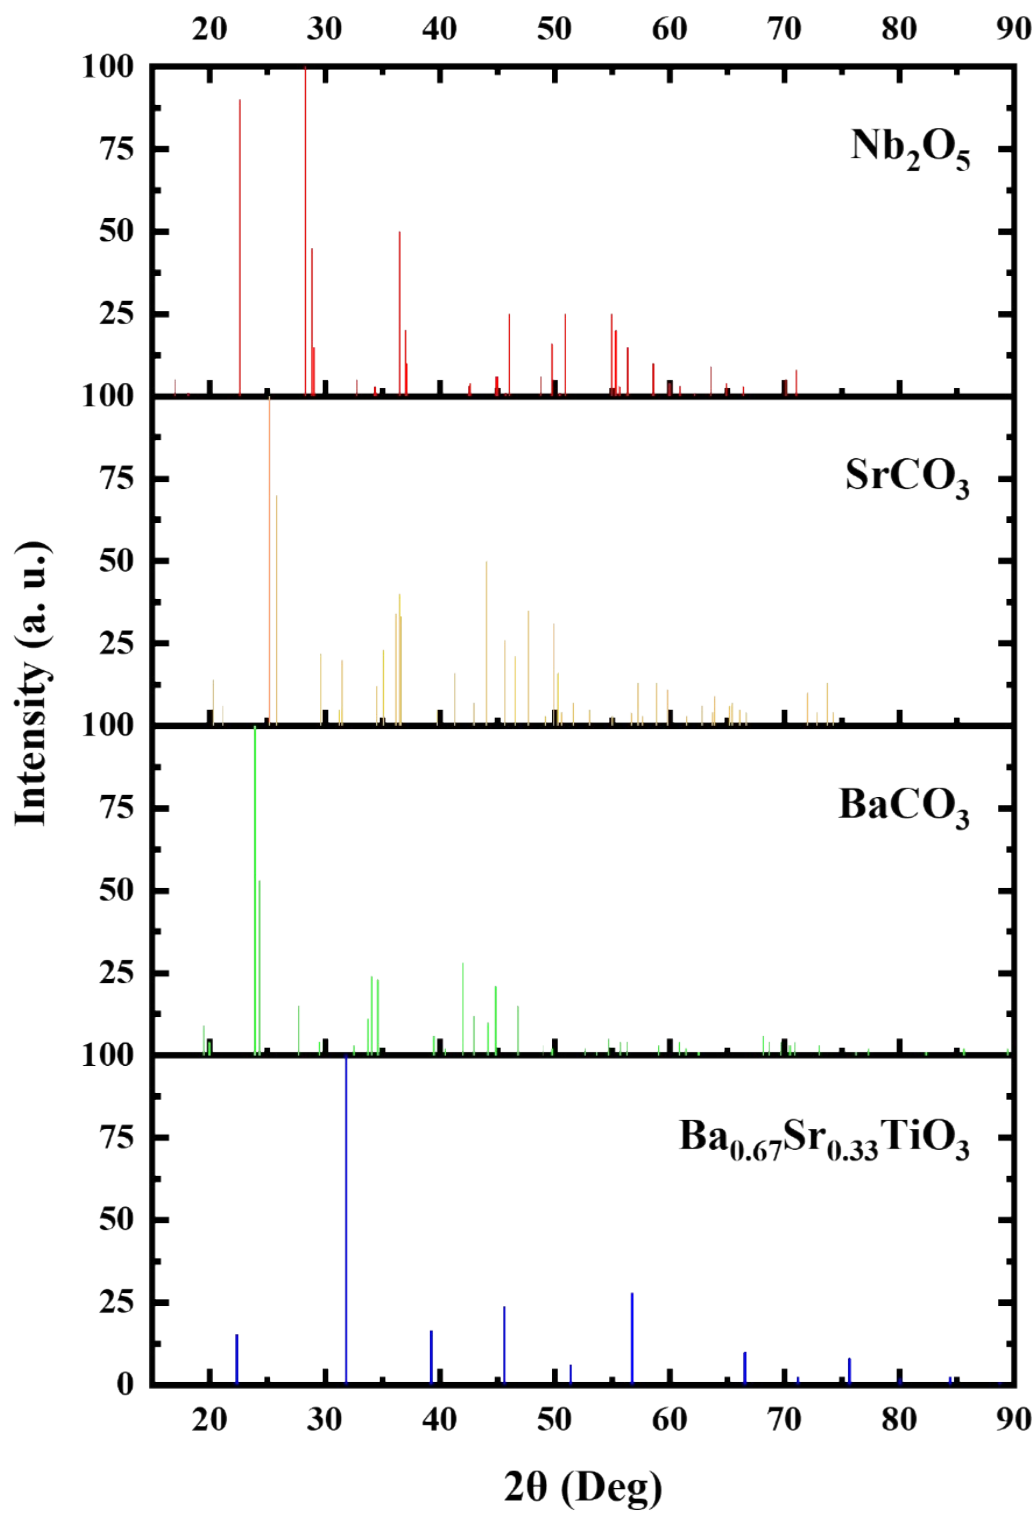

Fig. S1 Standard XRD for each phase

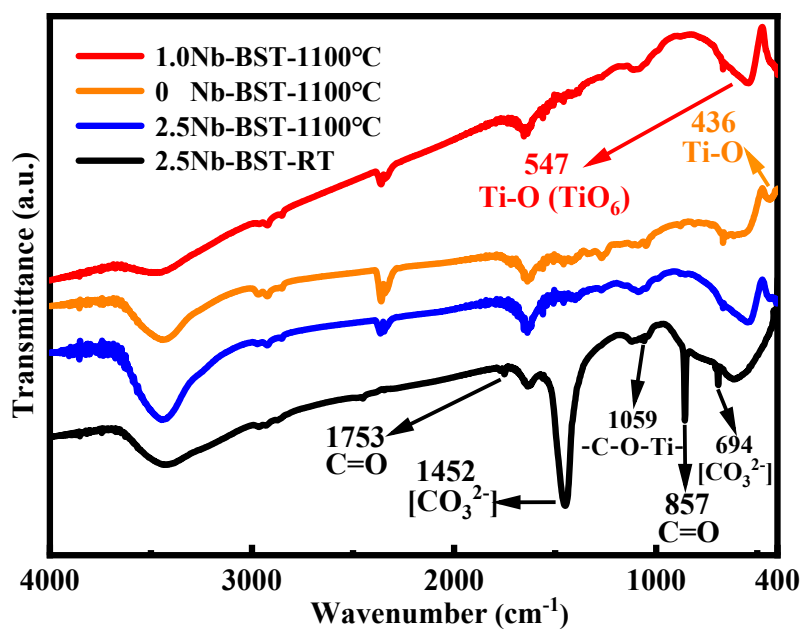

Fig. S2 FT-IR of Nb doped BST and precursor xerogel

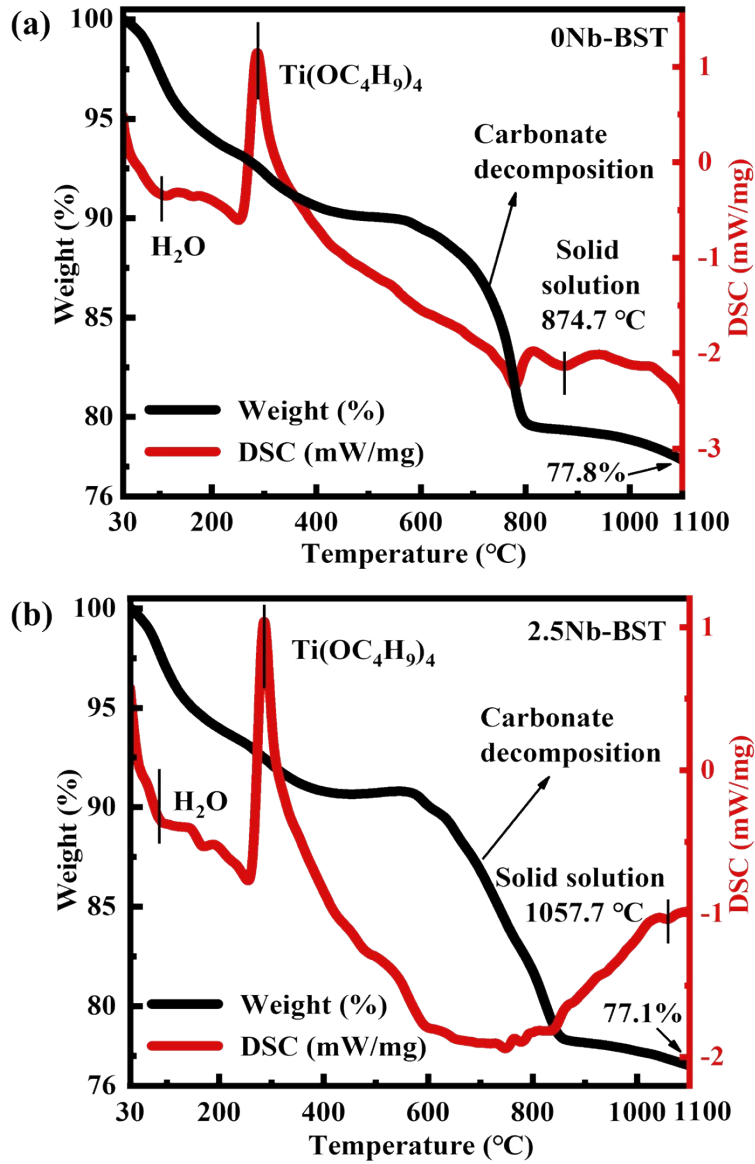

Fig. S3 TG-DSC: (a) 0Nb-BST gel, (b) 2.5Nb-BST gel

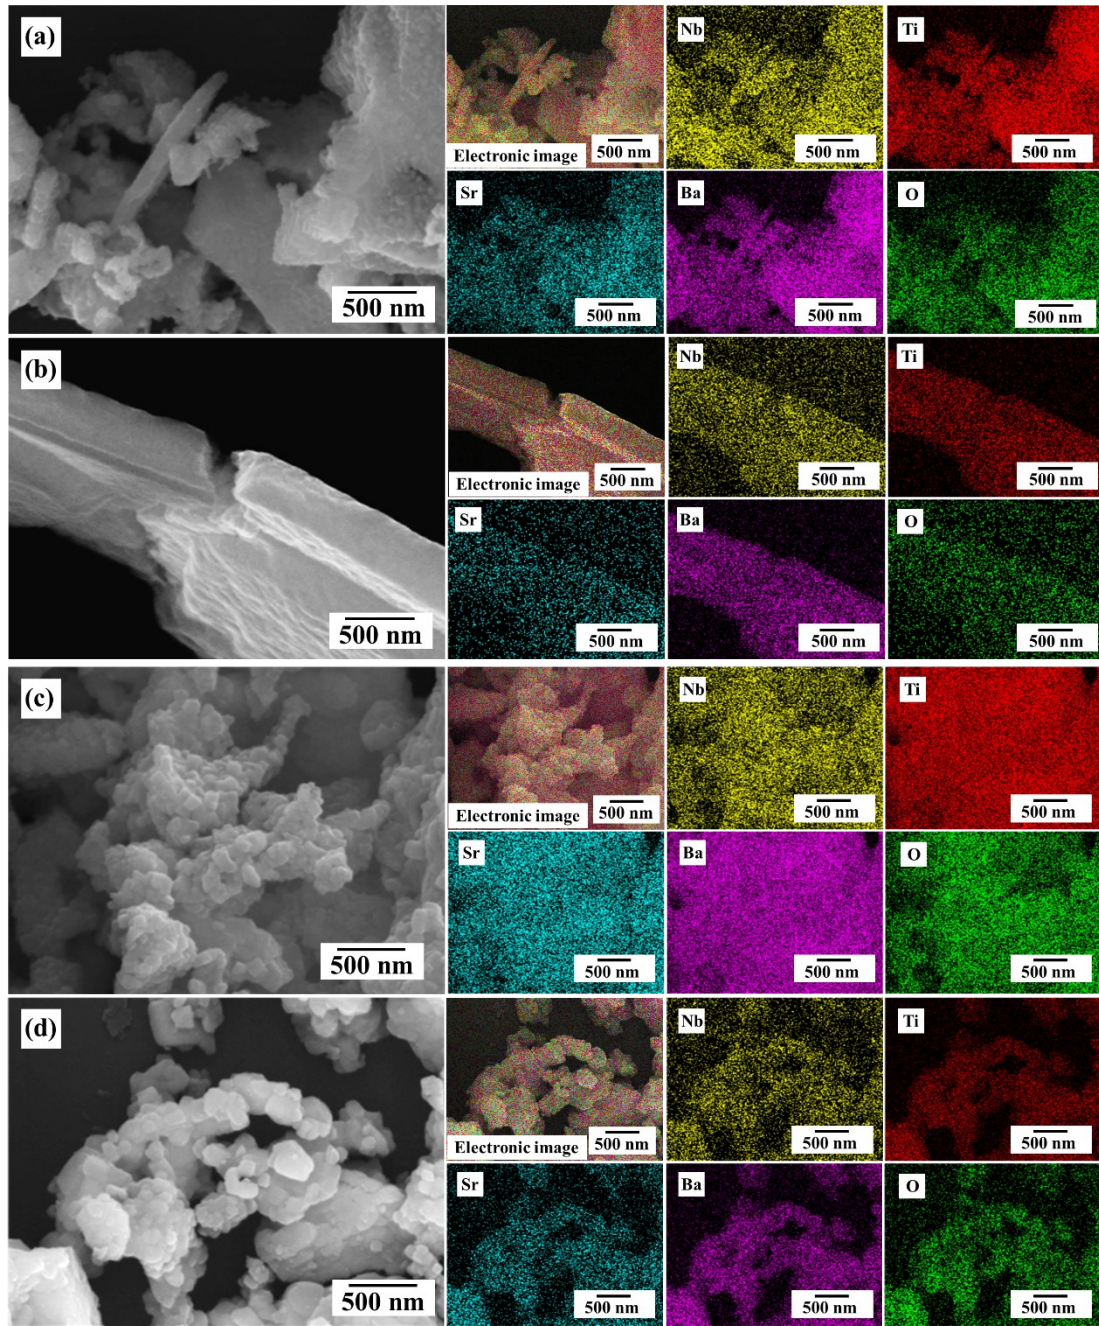

Fig. S4 EDS elemental distribution of 2.5Nb-BST in different temperature heat treatment: (a) 700 °C, (b) 800 °C, (c) 1000 °C, and (d) 1100 °C

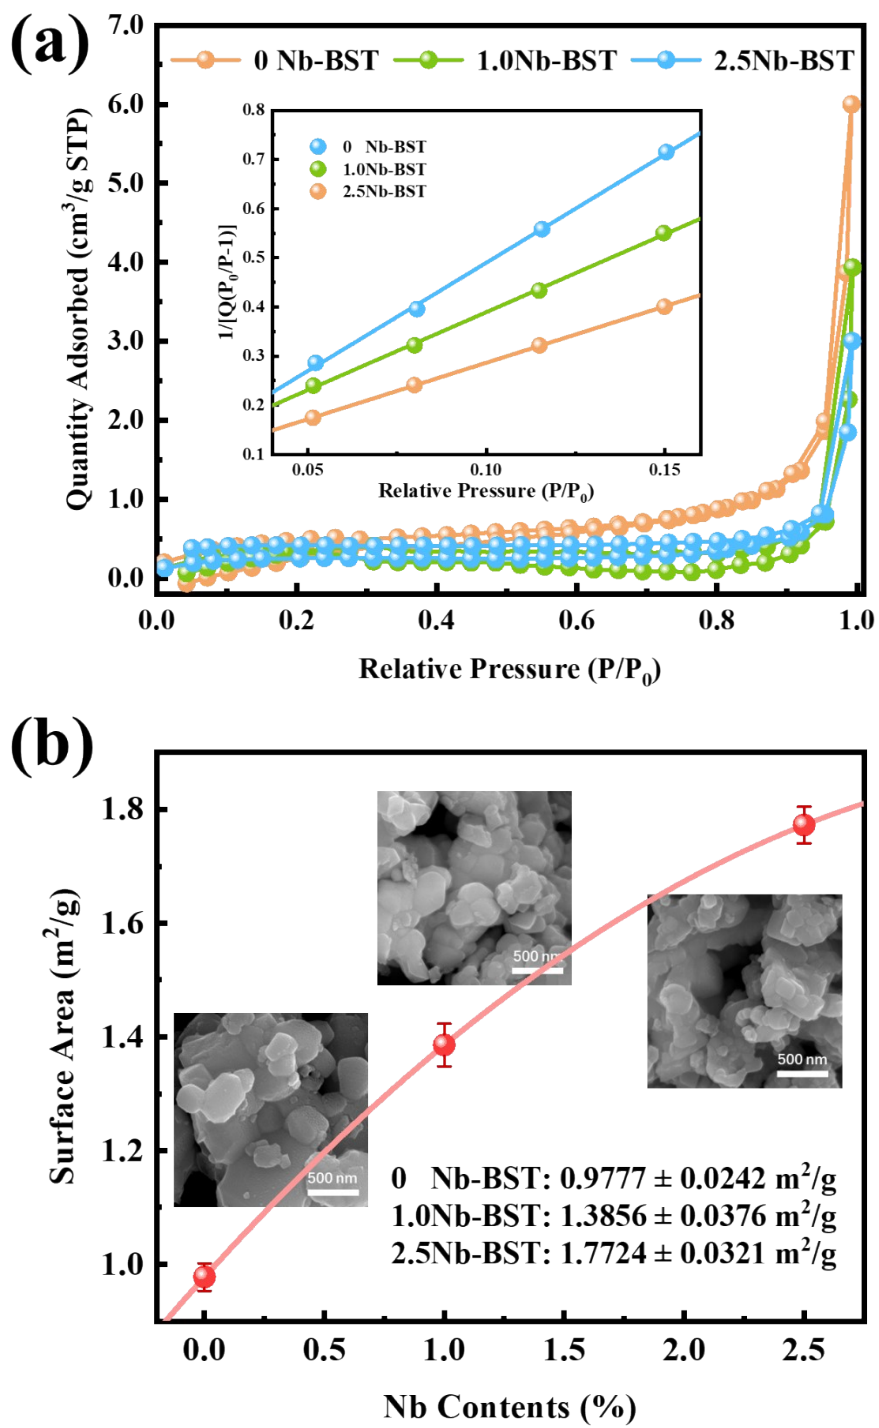

Fig. S5 (a) Adsorption and desorption curves and BET of xNb-BST, (b) specific surface area statistics

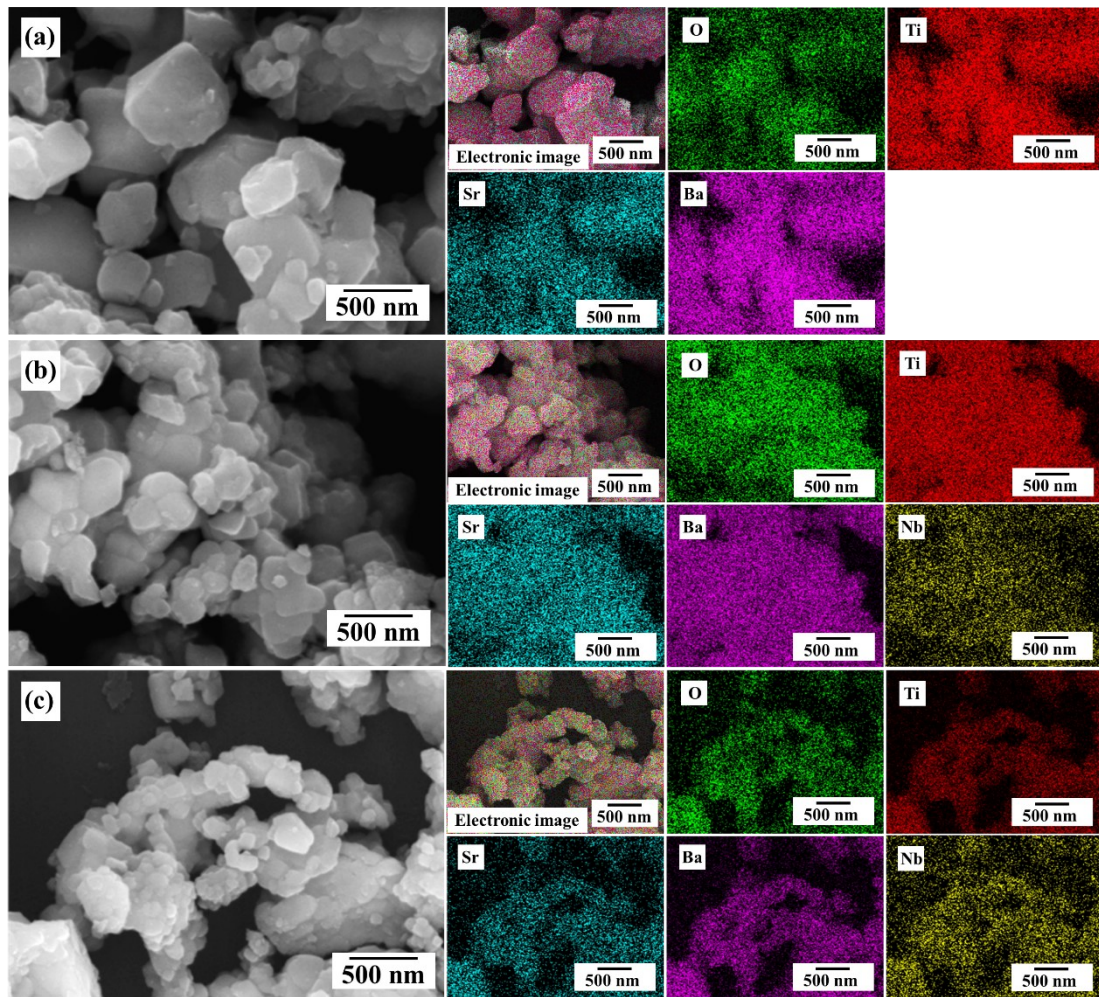

Fig. S6 EDS elemental distribution of xNb-BST-1100 °C.: (a) 0Nb-BST, (b) 1.0Nb-BST, and (c) 2.5Nb-BST

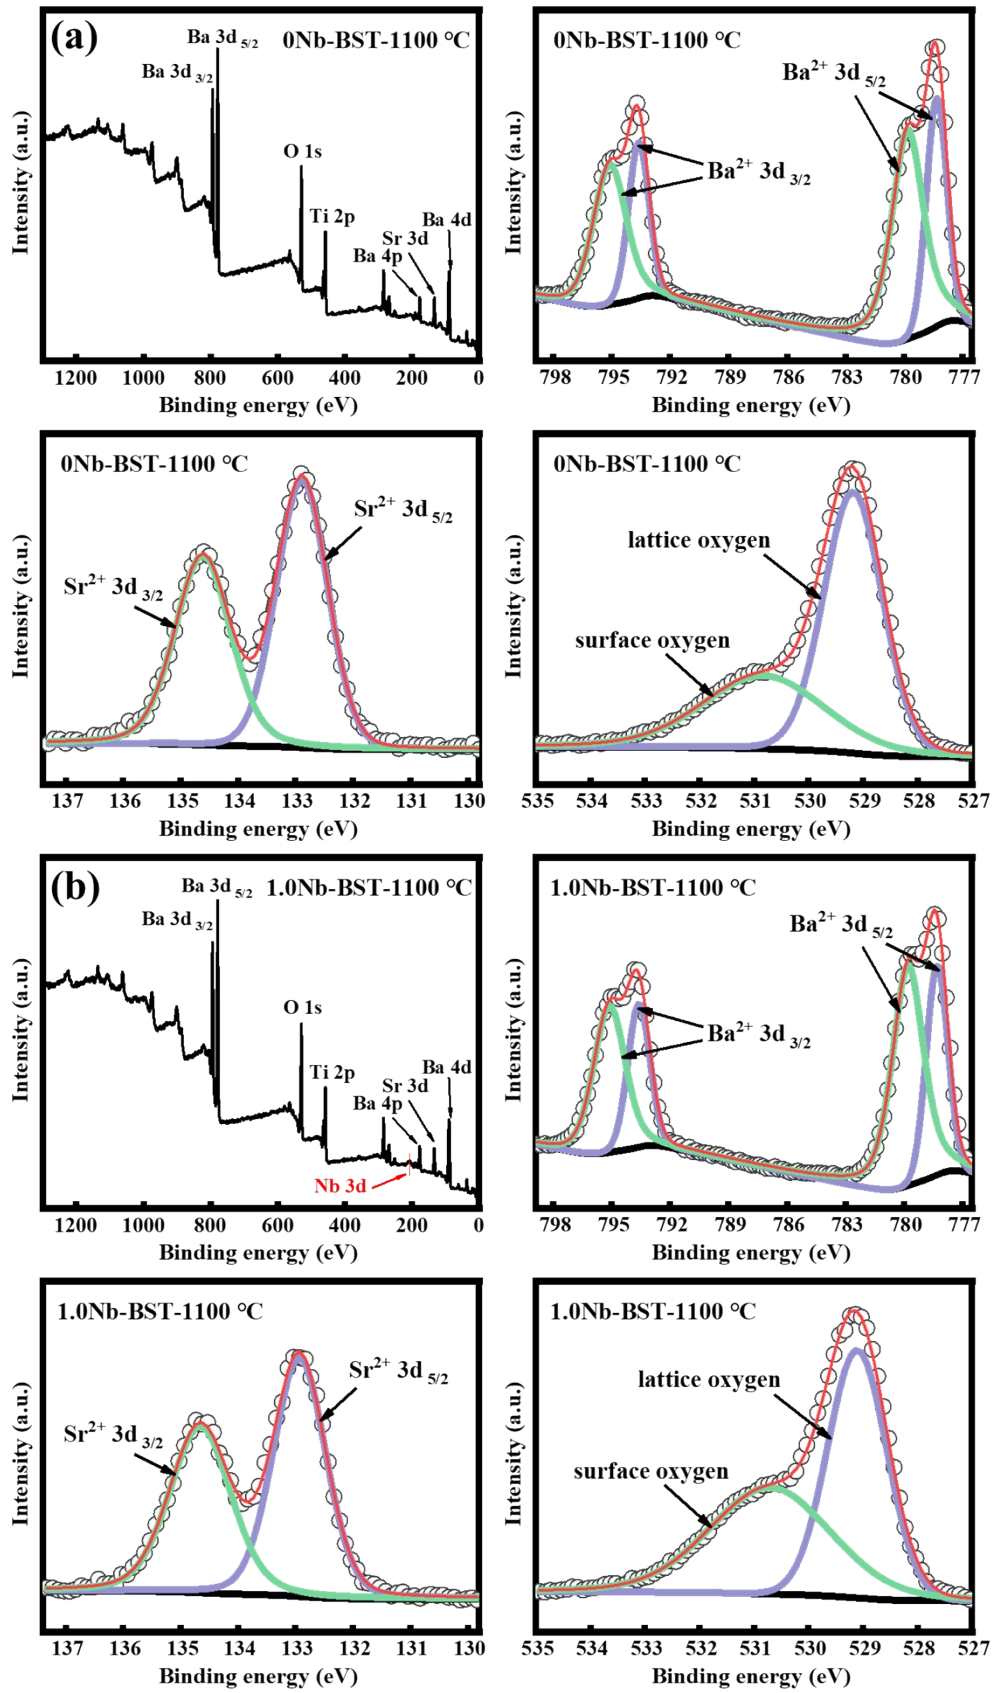

Fig. S7 (a) XPS of 0Nb-BST, (b) XPS of 1.0Nb-BST



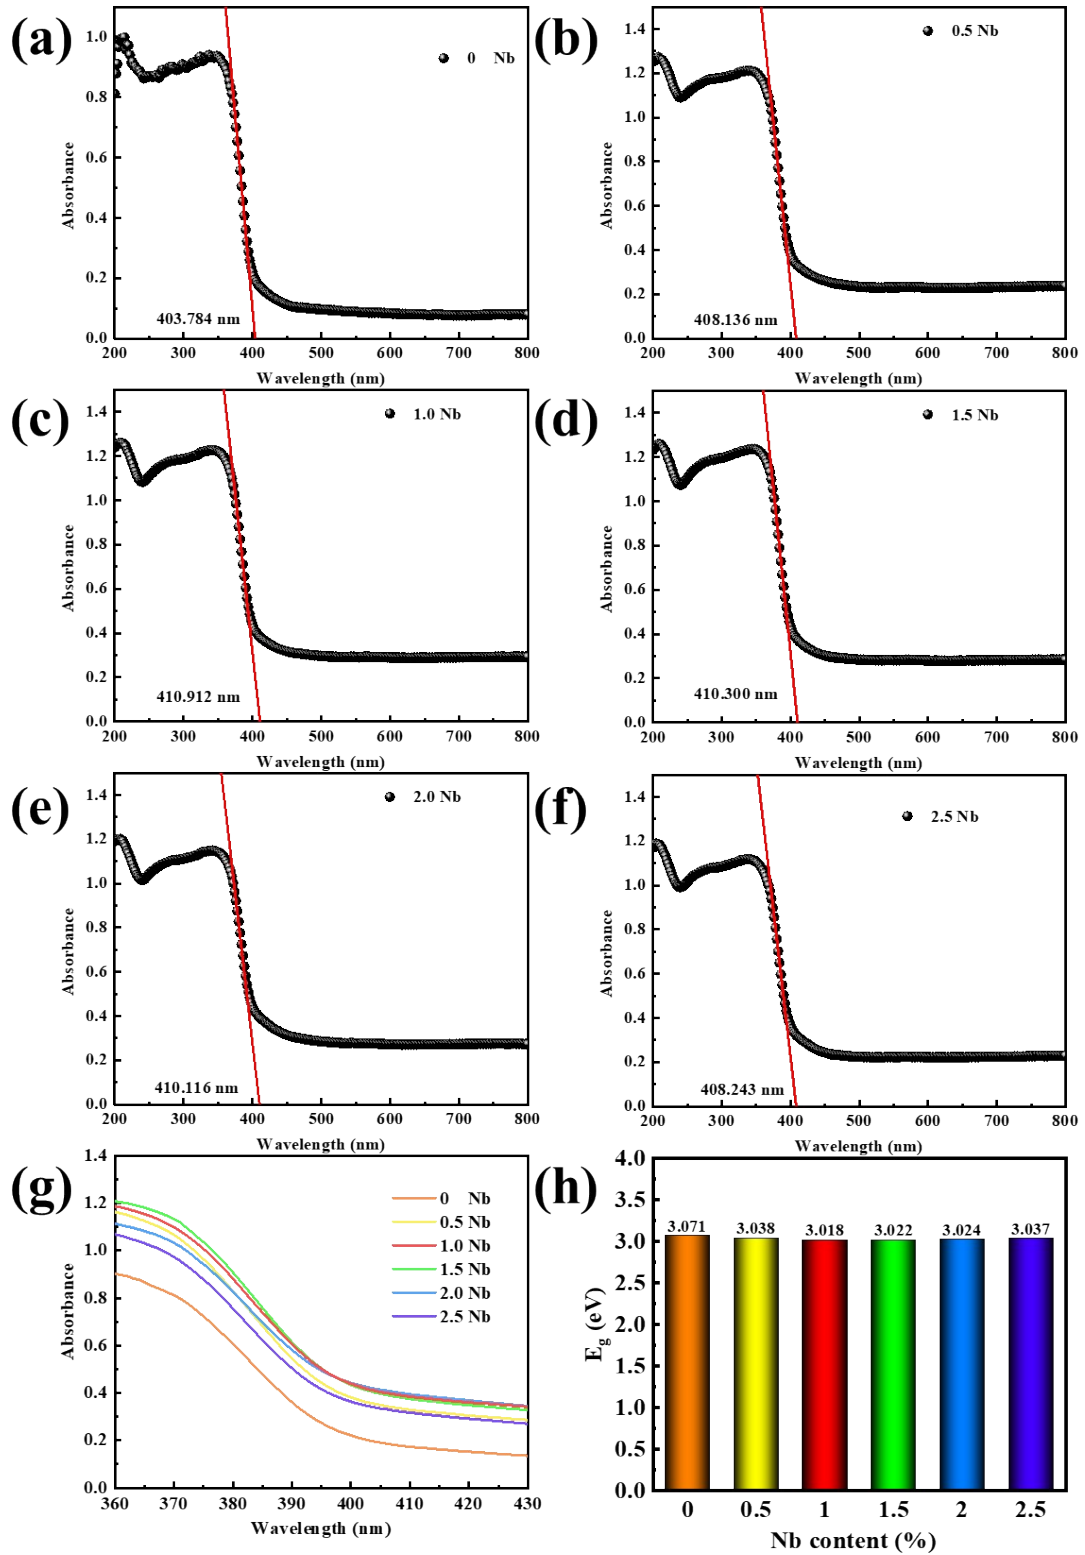

Fig. S8 UV-Vis of (a) 0Nb-BST, (b) 0.5Nb-BST, (c) 1.0Nb-BST, (d) 1.5Nb-BST, (e) 2.0Nb-BST, (f) 2.5Nb-BST, (g) partial enlargement (h) energy band gap from UV-Vis

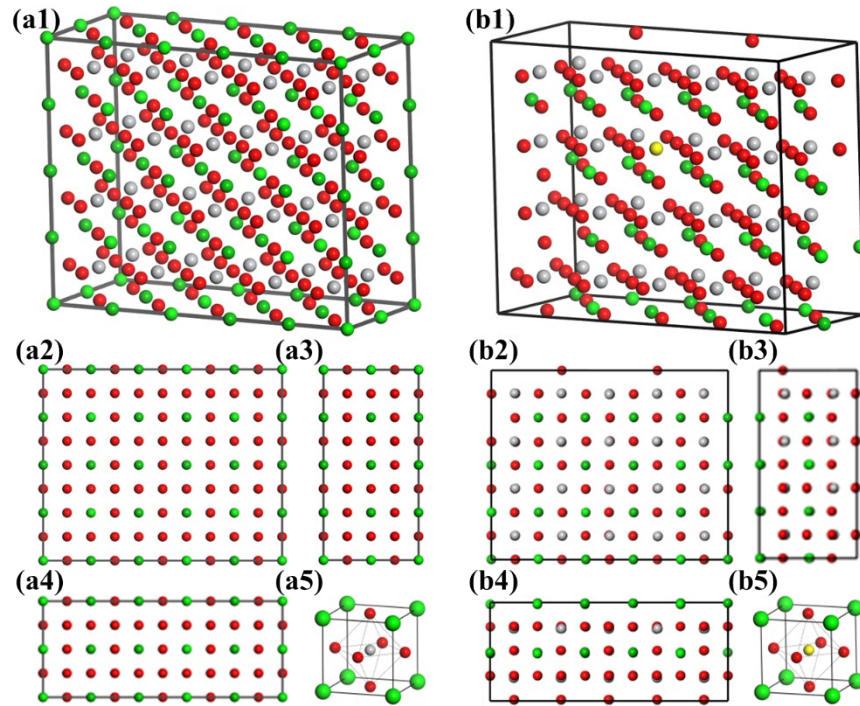

Fig. S9 First principles models: (a1)-(a5) Undoped BST, (b1)-(b5) Nb doped BST.

To simplify the theoretical calculation of the band structure of Nb doped BST, the following approximation is processed for Nb doped BST firstly. As shown in Figure S5:

(1) In 40 original cells, the number of  $\text{Ba}^{2+}$  and  $\text{Sr}^{2+}$  in BST are 27 and 13, respectively, which means that the mole fraction of Ba is 67.5% (the actual value is 70 %), the mole fraction of Sr is 32.5% (the actual value is 30%). However, the doped Nb would induce lattice distortion of BST, which changes its symmetry, as shown in Fig. S5 (b).

(2) It is believed that the valence state of the doped  $\text{Nb}^{5+}$  ions has not changed, and they are all  $\text{Nb}^{5+}$ .

(3) The doping amount of  $\text{Nb}^{5+}$  was properly increased. One  $\text{Ti}^{4+}$  ion was replaced with one  $\text{Nb}^{5+}$  ion in the 40 original cells. Therefore, the mole fraction of  $\text{Nb}^{5+}$  is 2.5% (the actual Nb doping range is 0-2.5%).

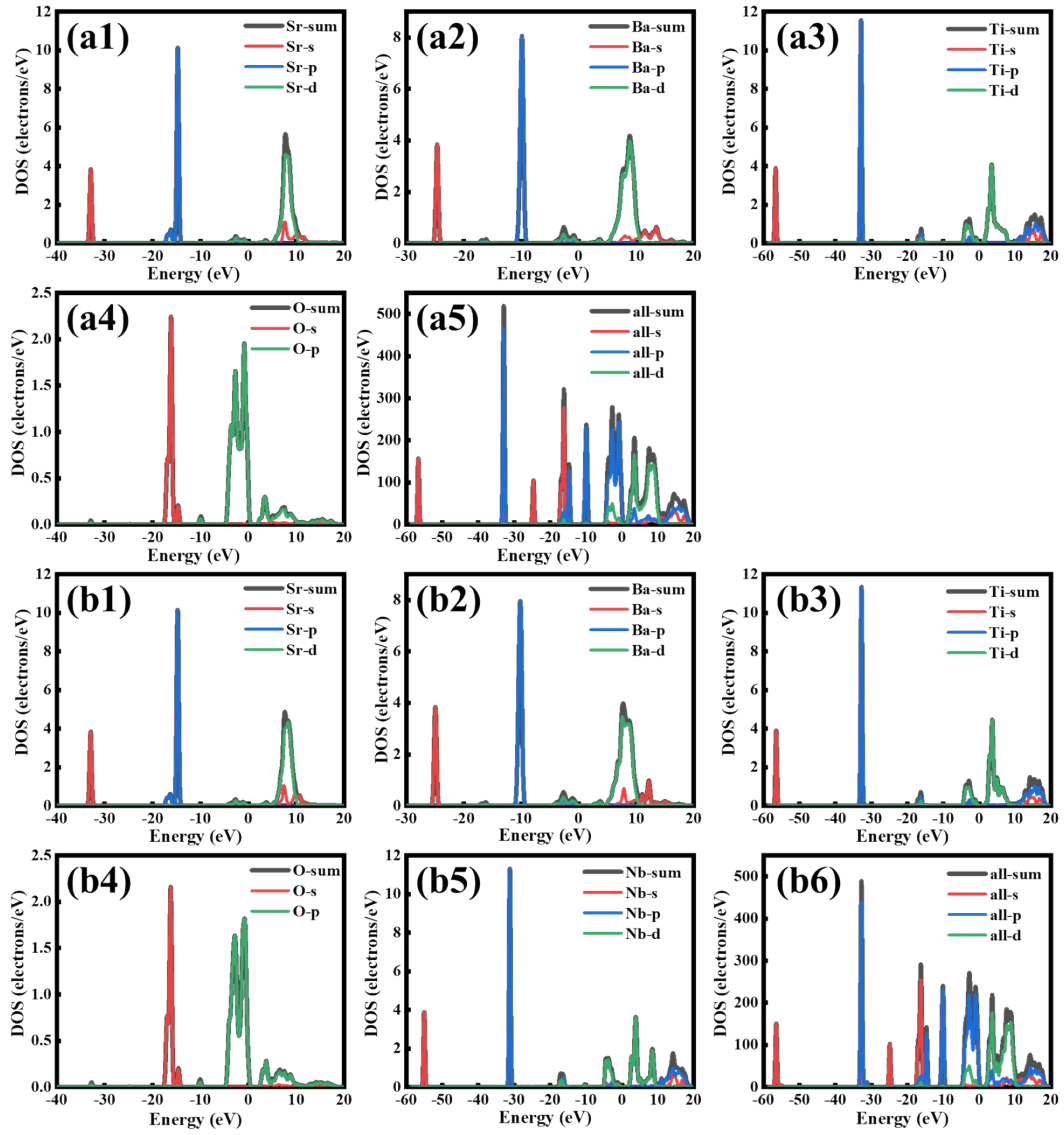

Fig. S10 Density of States: (a1)-(a5) Undoped BST, (b1)-(b6) Nb doped BST.

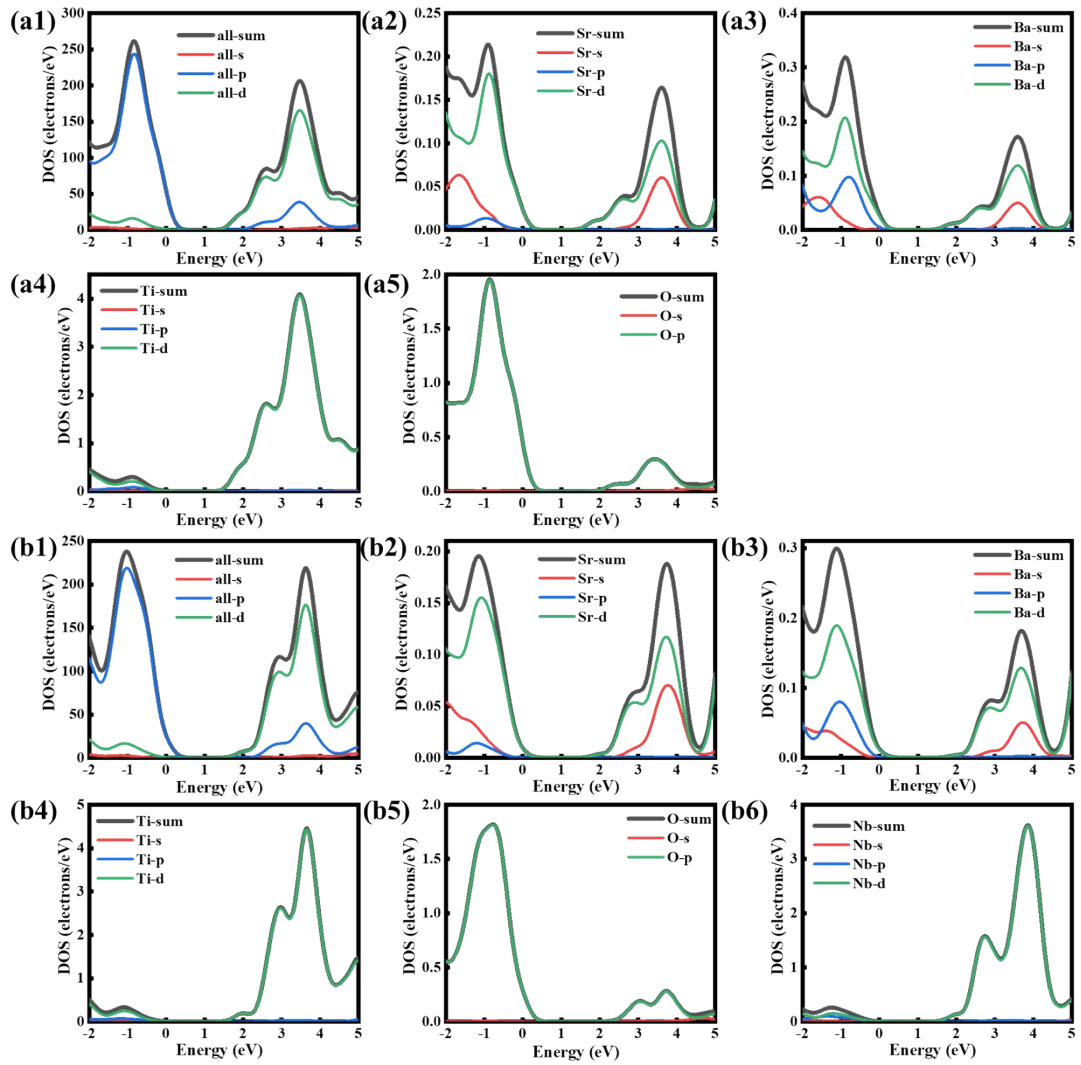

Fig. S11 The DOS around Fermi level: (a1)-(a5) Undoped BST, (b1)-(b6) Nb doped BST.

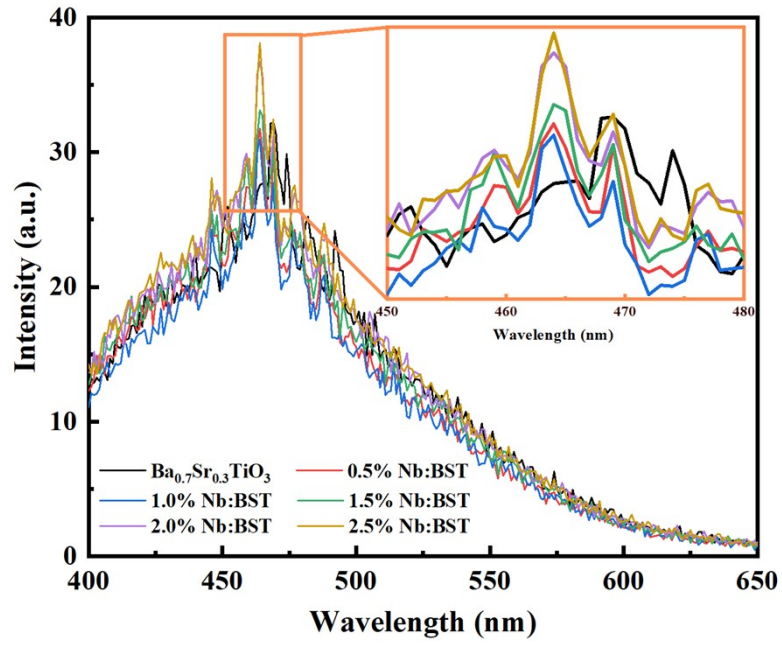

Fig. S12 The photoluminescence spectrum of Nb-doped BST.

Table. S1 Summary of photocatalysts for H<sub>2</sub> evolution. (In addition to special notes, numerical values are in units of headings.)

| Materials                                                                              | Light source      | Light power (W) | Co-catalyst (wt%)                      | Coupling field | H <sub>2</sub> evolution (μmol·g <sup>-1</sup> ·h <sup>-1</sup> ) | Ref.      |
|----------------------------------------------------------------------------------------|-------------------|-----------------|----------------------------------------|----------------|-------------------------------------------------------------------|-----------|
| Nb-Ba <sub>0.7</sub> Sr <sub>0.3</sub> TiO <sub>3</sub>                                | Xenon lamp        | 210             | H <sub>2</sub> PtCl <sub>6</sub> (1.0) | None           | 27.52                                                             | This work |
| Sr <sub>0.9</sub> La <sub>0.1</sub> Ti <sub>0.9</sub> Cr <sub>0.1</sub> O <sub>3</sub> | Xenon lamp        | 300             | Pt (1.0)                               | None           | 28.8                                                              | 1         |
| BaTiO <sub>3</sub> /MoS <sub>x</sub>                                                   | Xenon lamp        | 300             | H <sub>2</sub> PtCl <sub>6</sub> (52)  | None           | 1485                                                              | 2         |
| Ag-Pd-Sn-Ni-BaTiO <sub>3</sub>                                                         | Xenon lamp        | 300             | None                                   | Electric field | 156.7 μmol·h <sup>-1</sup>                                        | 3         |
| Pt/BaTiO <sub>3</sub>                                                                  | Xenon lamp        | 300             | None                                   | Electric field | 4.77 μmol·h <sup>-1</sup>                                         | 4         |
| TiO <sub>2</sub> /BaTiO <sub>3</sub>                                                   | Xenon lamp        | 300             | None                                   | Ultrasonic     | 67.7                                                              | 5         |
| BaTiO <sub>3</sub> @ZnIn <sub>2</sub> S <sub>4</sub>                                   | Xenon lamp        | Not mentioned   | None                                   | Ultrasonic     | 8041 μmol·g <sup>-1</sup>                                         | 6         |
| Rh-BaTiO <sub>3</sub>                                                                  | Xenon lamp        | 300             | Pt (0.25)                              | None           | 30 μmol·h <sup>-1</sup>                                           | 7         |
| Pt/ZnIn <sub>2</sub> S <sub>4</sub> /BaTiO <sub>3</sub>                                | Xenon lamp        | 300             | None                                   | None           | 1335.3                                                            | 8         |
| BaTiO <sub>3</sub> /CaFe <sub>2</sub> O <sub>4</sub>                                   | metal halide lamp | 250             | None                                   | None           | 2240                                                              | 9         |
| Rh-CaTiO <sub>3</sub>                                                                  | Xenon lamp        | 300             | H <sub>2</sub> PtCl <sub>6</sub> (0.1) | None           | 16.6                                                              | 10        |

## References

1. L. Lu, S. Ni, G. Liu, X. Xu, *Int. J. Hydrogen Energ.*, 2017, **42**, 23539-23547.
2. T. Kuru, G. Yanalak, A. Sarilmaz, E. Aslan, A. Keles, M. T. Genc, F. Ozel, I. H. Patir, M. Kus, M. Ersoz, *J. Photoch. Photobio. A.*, 2023, **436**, 114375.
3. B. Niu, Z. Xu, *Sustain. Mater. Techno.*, 2019, **21**, e00101.
4. S. Assavachin, F. E. Osterloh, *J. Am. Chem. Soc.*, 2023, **145**, 18825-18833.
5. H. Li, Y. Song, J. Zhang, J. He, *Nanoscale Adv.*, 2021, **3**, 5618-5625.
6. P. Wang, S. Fan, X. Li, J. Wang, Z. Liu, C. Bai, M. O. Tadé, S. Liu, *Nano Energy*, 2021, **89**, 106349.
7. K. Maeda, *ACS Appl. Mater. Interfaces*, 2014, **6**, 2167-2173.
8. Z. Yang, X. Xia, M. Fang, L. Wang, S. Pan, Y. Guo, *Mater. Today Phys.*, 2023, **36**, 101158.
9. N. K. Veldurthi, N. K. Eswar, S. A. Singh, G. Madras, *Int. J. Hydrogen Energ.*, 2018, **43**, 22929-22941.
10. S. Nishimoto, M. Matsuda, M. Miyake, *Chem. Lett.*, 2006, **35**, 308.
